# Supplementary material
Source: PubMed Central journal article supplement (PMC4504110)
Supplement: jcav06p0740s1.pdf [file jcav06p0740s1.pdf]

**Supplementary Table 1.** The clinical characteristics of 48 patients with hepatocellular carcinoma

| Case No. | Age | Sex | Tumor Size (cm) | Differentiation | Cirrhosis | AFP   | ALB  | ALP | HBV | Survival (months) | Status          | Recurrence |
|----------|-----|-----|-----------------|-----------------|-----------|-------|------|-----|-----|-------------------|-----------------|------------|
| 1        | 75  | F   | 2.4             | 2               | 1         | 6310  | 39   | 308 | 0   | 62                | Alive (lost FU) | No         |
| 2        | 67  | M   | 4               | 3               | 1         | 33    | 38   | 48  | 1   | 24.17             | Died            | Confirmed  |
| 3        | 43  | M   | 4.5             | 3               | 1         | 4706  | 47   | 82  | 1   | 61.73             | Died            | Confirmed  |
| 4        | 54  | M   | 8               | 2               | 0         | 7326  | 43   | 105 | 1   | 2.63              | Died            | No         |
| 5        | 54  | M   | 2.5             | 2               | 1         | 3650  | 35   | 218 | 1   | 21.67             | Died            | Confirmed  |
| 6        | 62  | F   | 2               | 2               | 1         | 4957  | 42   | 231 | 0   | 0.37              | Died            | No         |
| 7        | 40  | M   | 8.5             | 2               | 1         | 26900 | 43   | 144 | 1   | 3.03              | Died            | No         |
| 8        | 35  | M   | 3.5             | 2               | 1         | 1321  | 33   | 45  | 1   | 18.07             | Died            | Confirmed  |
| 9        | 37  | M   | 2.8             | 2               | 1         | 10    | 30   | 156 | 1   | 56.63             | Died            | No         |
| 10       | 60  | M   | 4.7             | 1               | 1         | 10    | 27   | 207 | 1   | 47.7              | Died            | Confirmed  |
| 11       | 62  | M   | 11              | 1               | 1         | N/A   | 30   | 156 | 1   | 0.8               | Died            | No         |
| 12       | 68  | F   | 8               | 2               | 1         | 4800  | 32.5 | 169 | 1   | 7.03              | Died            | Confirmed  |
| 13       | 71  | M   | 5               | 2               | 1         | 76    | 33   | 92  | 1   | 52.4              | Died            | Confirmed  |
| 14       | 54  | F   | 11              | 2               | 0         | 36    | 37   | 89  | 0   | 80.33             | Alive           | No         |
| 15       | 46  | M   | 7.5             | 2               | 0         | 46230 | 34   | 57  | 1   | 9.77              | Died            | Confirmed  |
| 16       | 34  | M   | 2.5             | 1               | 1         | 312   | 20   | 191 | 1   | 80.33             | Alive           | Confirmed  |
| 17       | 71  | M   | 14              | 3               | 0         | 14715 | 30   | 122 | 1   | 3.67              | Died            | Confirmed  |
| 18       | 58  | M   | 3               | 1               | 1         | 4788  | 30   | 64  | 1   | 47.33             | Died            | Confirmed  |
| 19       | 40  | F   | 3               | 2               | 1         | 329   | 32   | 57  | 1   | 3.17              | Died            | No         |
| 20       | 62  | M   | 5.5             | 1               | 0         | 10    | 40   | 72  | 1   | 46.6              | Alive           | No         |
| 21       | 58  | F   | 2.5             | 2               | 0         | 694   | 42   | 52  | 1   | 31.43             | Alive           | No         |
| 22       | 53  | M   | 5               | 2               | 0         | 76    | 34   | 120 | 1   | 21.3              | Died            | Confirmed  |
| 23       | 45  | M   | 3.5             | 0               | 1         | 4     | 43   | 65  | 1   | 44.07             | Alive           | No         |
| 24       | 34  | M   | 3               | 2               | 1         | 2727  | 41   | 97  | 1   | 44.03             | Alive           | No         |
| 25       | 66  | M   | 7               | 2               | 0         | 12    | 40   | 94  | 1   | 41.47             | Died            | No         |
| 26       | 66  | M   | 7.5             | 2               | 1         | 971   | 34.3 | 155 | 1   | 0.83              | Died            | No         |
| 27       | 64  | M   | 4.5             | 2               | 1         | 35    | 39   | 156 | 1   | 30.57             | Died            | Confirmed  |
| 28       | 74  | M   | 6               | 1               | 0         | 11    | 33   | 117 | 1   | 39.63             | Alive (lost FU) | Confirmed  |

|    |    |   |     |   |   |       |      |     |   |       |                 |           |
|----|----|---|-----|---|---|-------|------|-----|---|-------|-----------------|-----------|
| 29 | 68 | M | 2.5 | 2 | 1 | 439   | 28   | 117 | 1 | 4.63  | Died            | No        |
| 30 | 48 | M | 7.5 | 0 | 0 | 309   | 36   | 58  | 1 | 38.93 | Died            | No        |
| 31 | 67 | M | 6   | 0 | 1 | 45    | 29   | 226 | 1 | 0.43  | Died            | No        |
| 32 | 42 | M | 4   | 2 | 0 | 115   | 40   | 77  | 1 | 46.17 | Died            | Confirmed |
| 33 | 48 | M | 2   | 2 | 1 | 4     | 40   | 92  | 1 | 29.67 | Died            | No        |
| 34 | 49 | M | 2.2 | 2 | 1 | N/A   | N/A  | N/A | 1 | 0.2   | Died            | No        |
| 35 | 45 | M | 1.5 | 2 | 1 | 5.5   | 38   | 113 | 1 | 30.03 | Died            | No        |
| 36 | 17 | M | 5   | 2 | 0 | 49890 | 32   | 83  | 1 | 42.77 | Died            | Confirmed |
| 37 | 68 | M | 6.5 | 1 | 1 | 26    | 28   | 70  | 1 | 0.47  | Died            | No        |
| 38 | 55 | M | 6   | 2 | 1 | 511   | 41   | 85  | 1 | 0.47  | Died            | No        |
| 39 | 66 | F | 8   | 2 | 1 | N/A   | 34   | 133 | 1 | 41.5  | Died            | No        |
| 40 | 59 | M | 5.5 | 2 | 1 | 555   | 40   | 112 | 1 | 0.1   | Died            | No        |
| 41 | 48 | M | 3   | 2 | 1 | 610   | 40   | 95  | 1 | 40.77 | Alive (lost FU) | Confirmed |
| 42 | 69 | F | 7.5 | 1 | 1 | 11    | 28   | 116 | 1 | 1.8   | Died            | No        |
| 43 | 51 | M | 5.5 | 2 | 0 | 4     | 31   | 70  | 1 | 38.9  | Died            | No        |
| 44 | 44 | M | 7   | 3 | 0 | 29    | 34   | 95  | 1 | 21.63 | Died            | Confirmed |
| 45 | 60 | M | 2.5 | 0 | 1 | 626   | 33.6 | 111 | 1 | 28.9  | Died            | No        |
| 46 | 62 | M | 16  | 2 | 0 | 83    | 39   | 108 | 1 | 34.5  | Alive (lost FU) | Confirmed |
| 47 | 33 | M | 7   | 1 | 1 | 45660 | 37   | 133 | 1 | 3.1   | Died            | No        |
| 48 | 58 | M | 5   | 1 | 1 | N/A   | N/A  | N/A | 1 | 25.6  | Died            | No        |

Differentiation: 0: Clear cell carcinoma; 1: Well-differentiated; 2: Moderate-differentiated; 3: Poor-differentiated. Cirrhosis: 1: with cirrhosis; 0: without cirrhosis. HBV: 1: with HBV; 0: without HBV; N/A: not available.
